# Supplementary material
Source: MDPI journal article supplement (doi:10.3390/lipidology3020012)
Supplement: s1 [file lipidology-4193959-supplementary.pdf › lipidology-4193959-supplementary.pdf]

**Table S1.** Table showing the mean  $\pm$  SD of cell viability expressed as log2 fold change relative to the control following the indicated treatments.

| Treatments                    | 48h                | 72h                |
|-------------------------------|--------------------|--------------------|
| ato 10 $\mu$ m                | -0.693 $\pm$ 0.119 | -2.310 $\pm$ 0.675 |
| lan 5 $\mu$ m                 | -0.177 $\pm$ 0.020 | -0.433 $\pm$ 0.236 |
| lan 10 $\mu$ m                | -0.90 $\pm$ 0.086  | -1.733 $\pm$ 0.591 |
| ato 10 $\mu$ m lan 5 $\mu$ m  | -0.873 $\pm$ 0.151 | -2.668 $\pm$ 0.666 |
| ato 10 $\mu$ m lan 10 $\mu$ m | -1.550 $\pm$ 0.272 | -3.467 $\pm$ 0.084 |

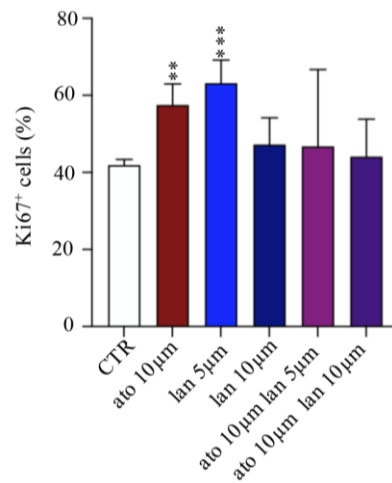

**Figure S1:** Bar plot showing the percentage of Ki67-positive cells treated for 48 h with ato and lan and their combination at the indicated doses. Data are presented as mean  $\pm$  SD (\*\*\*)  $p < 0.001$ ; \*\*  $0.001 < p < 0.01$ ).
